# Supplementary material for: Downregulation of lncRNA SLC7A11-AS1 decreased the NRF2/SLC7A11 expression and inhibited the progression of colorectal cancer cells
Source: PeerJ. 2023 Apr 14;11:e15216. doi: 10.7717/peerj.15216 (PMC10108855; doi:10.7717/peerj.15216)
Supplement: Supplemental Information 6 [file peerj-11-15216-s006.xlsx]

## Sheet: 1
The expression of SLC7A11-AS1 in 6 pairs of clinical tissues
Gene	Relative expression		P value
	Group A	Group B
SLC7A11-AS1	Normal tissue	Cancer tissue	0.002
	1.00231	35.261
	1	7.3615
	1	14.6891
	1.00023	15.7469
	1	39.5334
	1	21.259

## Sheet: Sheet3
Quantity analysis of SLC7A11-AS1 knockdown
SLC7A11-AS1	NC ASO	SLC7A11-AS1 ASO	<0.0001
	1	0.008116
	1	0.039418
	1	0.062935

## Sheet: Sheet2
The distribution of SLC7A11-AS1 in the cytoplasm and nucleus
Gene	Relative expression		P value
	Group A	Group B
	Cytoplasm	Nucleus
GAPDH	63.0889	36.9111	<0.0001
MT-RNR1	91.1807	8.81926
U99	6.58386	93.4161
SLC7A11-AS1	4.50249	95.4975
