# Supplementary material for: Downregulation of lncRNA SLC7A11-AS1 decreased the NRF2/SLC7A11 expression and inhibited the progression of colorectal cancer cells
Source: PeerJ. 2023 Apr 14;11:e15216. doi: 10.7717/peerj.15216 (PMC10108855; doi:10.7717/peerj.15216)
Supplement: Supplemental Information 8 [file peerj-11-15216-s008.xlsx]

## Sheet: Sheet2
HCT-8		Group A			Group B			P value
		NC ASO			SLC7A11-AS1 ASO
CCK-8 (OD value)	0	0.23428	0.2628	0.17075	0.221738	0.222	0.1485	<0.0001
	24	0.888333	0.744	0.62275	0.262067	0.2894	0.2455	<0.0001
	48	1.7672	1.578	1.62975	0.68844	0.461	0.42325	<0.0001
	72	2.9723	2.8744	2.7898	1.25063	1.0536	1.14825	<0.0001
HCT-116		Group A			Group B			P value
		NC ASO			SLC7A11-AS1 ASO
CCK-8 (OD value)	0	0.7978	0.8139	0.7567	0.7654	0.7826	0.7362	<0.0001
	24	1.5999	1.7581	1.5275	1.2313	1.1478	1.2982	<0.0001
	48	2.4538	2.5402	2.4237	1.3796	1.3999	1.5581	<0.0001
	72	4.0154	3.8227	4.1602	2.3409	2.4829	2.1513	<0.0001
Colony formation rate(HCT-8)		NC ASO			SLC7A11-AS1 ASO			0.0018
		0.884298			0.237477
		1.09917			0.454887
		1.02479			0.341532
Colony formation rate(HCT-116)		NC ASO			SLC7A11-AS1 ASO			0.0056
		1.01897			0.562193
		1.04357			0.6922
		0.938159			0.435699
		NC ASO			SLC7A11-AS1 ASO
area recovery(%)	0 h	0	0	0	0	0	0
	24 h	24.4625	26.2347	25.9969	10.9673	8.65578	8.4441	<0.0001
	48 h	33.1697	34.8232	30.6337	20.2531	18.395	18.2463	0.0005
Transwell		NC ASO			SLC7A11-AS1 ASO			0.0233
Relative migration(HCT-8)		1.08925			0.513858
		1.2079			0.613511
		0.956325			0.705416
Relative migration(HCT-116)		1.03637			0.428361			0.0009
		0.882439			0.466936
		1.08119			0.46914
Relative invasion(HCT-8)		1.00905			0.6823			0.0032
		0.951166			0.69739
		1.03978			0.79369
Relative invasion(HCT-116)		0.91254			0.293248			0.0008
		1.01672			0.396785
		0.871383			0.439871
ROS		NC ASO	SLC7A11-AS1 ASO	pcDNA3.1	pcDNA3.1-Nrf2			<0.0001
DHE relative fluorescence signal		11614	14817	14910	13113
		10821	15243	14067	10757
		11858	13927	13378	11742
